# Supplementary material
Source: PubMed Central journal article supplement (PMC3438984)
Supplement: supp_M112.396895_jbc.M112.396895-1.pdf [file supp_M112.396895_jbc.M112.396895-1.pdf]

**Figure S1.** Molecular weights for the expected products in each lane are provided at the bottom of the gel. **(A)** HEK293 cells expressing various RAGE truncations fused to GFP were blotted against anti-GFP and anti-Rluc antibodies, and similar ratios of receptor expression are observed for both constructs. **(B)** The same membrane probed with anti-GFP and anti-Rluc from **(A)** was blotted with an anti-tubulin antibody as a loading control to confirm similar levels of total sample per well.

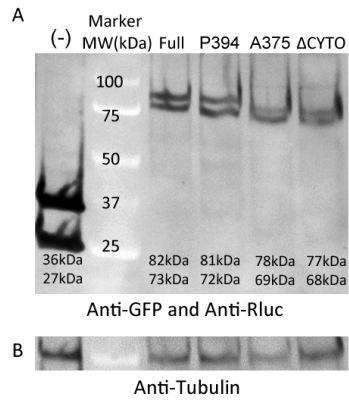

**Table S1: Primer Sequences Used for Subcloning.**

| <b>Primer Name</b>  | <b>Nucleic Acid Sequence</b>                    |
|---------------------|-------------------------------------------------|
| MBPspNcoIGf         | aaaaaaCCATGGAAATAAAAACAGGTGCACG                 |
| MBPHASacIr          | aaaaaaGAGCTCGAGCTCCGCATAATCCGG                  |
| nsigpMBPNcoIGf      | aaaaaaaaCCATGGGCAAAATCGAAGAAGGTAAACTGG          |
| AraC168KpnIf        | aaaaaaaaGGTACCAACGAGTCGCTCCATCCA                |
| AraCHindIIIr        | aaaaaaaaAAGCTTTTATGACAACCTTGACGGCTACATC         |
| RAGEFullBgIIIf      | aaaaaaaaAGATCTATGGCAGCCGGAACAG                  |
| RAGEfullSacIf       | aaaaaaaaGAGCTCATGGCAGCCGGAACAGC                 |
| RAGEprSacIf         | aaaaaaaaGAGCTCCGTGCTGTCAGCATCAGC                |
| RAGEcyKpnIr         | aaaaaaaaGGTACCAGGCCCTCCAGTACTACTCTCG            |
| RAGETMSacIf         | aaaaaaaaGAGCTCTCAGGGCTGGGAACCTTAGC              |
| RAGETMKpnIr         | aaaaaaaaGGTACCCCTTTGCCACAAGATGACC               |
| RAGEc1SacIf         | aaaaaaaaGAGCTCAAGCCAGAAATTGTAGATTCTGC           |
| RAGEc2SacIf         | aaaaaaaaagagctcCCCATCCAGCCCCGT                  |
| RAGE375AKpnIr       | aaaaaaaaGGTACCGGCCCTTCTCTCTCTCTCTCT             |
| RAGE394PKpnIr       | aaaaaaaaGGTACCAGGTTCTCCGACTGATTCA               |
| RAGE375AsacIr       | aaaaaaaaGAGCTCGGCCCTTCTCTCTCTCTCTCT             |
| RAGE394PsacIr       | aaaaaaaaGAGCTCAGGTTCTCCGACTGATTCA               |
| RAGEdelVNheIf       | aaaaaaaaGCTAGCATGAAGCCAGAAATTGTAGATTCTGCGCTAGC  |
| RAGEdelVBglIIIf     | aaaaaaaaAGATCTATGAAGCCAGAAATTGTAGATTCTGC        |
| RAGETMSacIr         | aaaaaaaaGAGCTCCCTTTGCCACAAGATGACC               |
| pBADdelAraCBglIIIf  | aaaaaaaaAGATCTATCGGCGTTAAACCC                   |
| pBADdelAraCBglIIr   | aaaaaaaaAGATCTGGTACCTACCGCACAGATGCG             |
| Alpha2BsacIf        | aaaaaaaaGAGCTCGCGATTCCGATTTGGTG                 |
| Alpha2BshortKpnIr   | aaaaaaaaGGTACCGCGGTTGCGTTTAAAAAAGC              |
| Alpha2BlongKpnIr    | aaaaaaaaGGTACCTTCGCCTTCTTCATCATCTTCT            |
| Alpha2Boligo1       | GCGGCGGCGCGGATTCCGATTGGTGGGTGCTGGTGGGCGTG       |
| Alpha2Boligo4       | CGGGCGGTTGCGTTTTAAAAAAGCCACTTCCACATCGCCAGCACCA  |
| Alpha2Boligo5       | GCTTTTTTAAACGCAACCGCCCGCGCTGGAAGAAGATGATGAAGAAG |
| Alpha2Boligo6       | CGCCGCGCTTCGCCTTCTTCATCATCTTCTTCCAGCG           |
| Alpha2Boligo2_wt    | GTCAGCAGCAGCAGGCCGCCAGCACGCCACCAGCACCCAC        |
| Alpha2Boligo3_wt    | GCGGCCTGCTGCTGCTGACCATTCTGGTGCTGGCGATGTGGAAAG   |
| Alpha2Boligo2_G976L | GTCAGCAGCAGCAGCAGGCCGCCAGCACGCCACCAGCACCCAC     |
| Alpha2Boligo3_G976L | GCCTGCTGCTGCTGCTGACCATTCTGGTGCTGGCGATGTGGAAAG   |
| Alpha2Boligo2_L980A | GTCGCCAGCAGCAGGCCGCCAGCACGCCACCAGCACCCAC        |
| Alpha2Boligo3_L980A | GCGGCCTGCTGCTGGCGACCATTCTGGTGCTGGCGATGTGGAAAG   |
| pet28MCSSacIf       | aaaaaaaaGAGCTCACTAGTGGATCCGAATTCGAcCTCCG        |
| pet28MCSKpnIr       | aaaaaaaaGGTACCTCTAGACTCGAGTGGCGCCGATGCTT        |
| RSFKanSpeIf         | aaaaaaaaACTAGTGGTCTTGAGGGTTTTTTTGC              |
| RSFKanSpeIr         | aaaaaaaaACTAGTGACTTCAGGTGCTACATTTGAAGAG         |
| pTrcSpeIf           | aaaaaaaaACTAGTCTTTCGCGGTATGGCATG                |
| pTrcSpeIr           | aaaaaaaaACTAGTTGAAGCATTTATCAGGGTTATTGTC         |

### **Sequence S1: pAraTM MCS Nucleic Acid Sequence**

MBP- (**SacI-SpeI-BamHI-EcoRI-GGCTCC-SalI-AAGTTTGGCGCCGCA-XhoI-XbaI-**

**KpnI**)-AraC 168

CGTATGATGTGCCGATTATGCGGAGCTCACTAGTGGATCCGAATTCGGCTCCGTCGACAAGTTTGGCGG  
CGCACTCGAGTCTAGAGGTACCATGAACGAGTCGCTCCATCCACCGATGG

### **Sequence S2: pAraTM Nucleic Acid Sequence (5611bp)**

CGAATGGTGCAAAACCTTTCGCGGTATGGCATGATAGCGCCCGGAAGAGAGTCAATTCAGGGTG  
GTGAATGTGAAACCAGTAACGTTATACGATGTCGCAGAGTATGCCGGTGTCTCTTATCAGACCG  
TTTCCCGCGTGGTGAACCAGGCCAGCCACGTTTCTGCGAAAACGCGGGAAAAAGTGGAAGCGGC  
GATGGCGGAGCTGAATTACATTCCCAACCGCGTGGCACAACAACCTGGCGGGCAAACAGTTCGTTG  
CTGATTGGCGTTGCCACCTCCAGTCTGGCCCTGCACGCGCCGTCGCAAATTGTCGCGGCGATTA  
AATCTCGCGCCGATCAACTGGGTGCCAGCGTGGTGGTGTTCGATGGTAGAACGAAGCGGCGTTCGA  
AGCCTGTAAAGCGGCGGTGCACAATCTTCTCGCGCAACGCGTCAGTGGGCTGATCATTAACTAT  
CCGCTGGATGACCAGGATGCCATTGCTGTGGAAGCTGCCTGCACTAATGTTCCGGCGTTATTTTC  
TTGATGTCTCTGACCAGACCCCATCAACAGTATTATTTTCTCCCATGAAGACGGTACGCGACT  
GGGCGTGGAGCATCTGGTCGCATTTGGGTCACCAGCAAATCGCGCTGTTAGCGGGCCCATTAAGT  
TCTGTCTCGGCGCGTCTGCGTCTGGCTGGCTGGCATAAATATCTCACTCGCAATCAAATTCAGC  
CGATAGCGGAACGGGAAGGCGACTGGAGTGCCATGTCCGGTTTTCAACAACCATGCAAATGCT  
GAATGAGGGCATCGTTCCCACTGCGATGCTGGTTGCCAACGATCAGATGGCGCTGGGCGCAATG  
CGCGCCATTACCGAGTCCGGGCTGCGCGTGGTGGGATATCTCGGTAGTGGGATACGACGATA  
CCGAAGACAGCTCATGTTATATCCCGCCGTCAACCACCATCAAACAGGATTTTCGCTGCTGGG  
GCAAACCAGCGTGGACCGCTTGCTGCAACTCTCTCAGGGCCAGGCGGTGAAGGGCAATCAGCTG  
TTGCCCGTCTCACTGGTGAAGAAAACCACCCTGGCGCCCAATACGCAAACCGCTCTCCCC  
GCGCGTTGGCCGATTCAATTAATGCAGCTGGCAGCAGAGTTTCCCAGCTGGAAAGCGGGCAGTG  
AGCGCAACGCAATTAATGTGAGTTAGCGCGAATTGATCTGGTTTGACAGCTTATCATCGACTGC  
ACGGTGCACCAATGCTTCTGGCGTCAGGCAGCCATCGGAAGCTGTGGTATGGCTGTGCAGGTCG  
TAAATCACTGCATAATTCGTGTGCTCAAGGCGCACTCCCCTTCTGGATAATGTTTTTTGCGCC  
GACATCATAACGGTCTGCGCAAATATTCTGAAATGAGCTGTTGACAATTAATCATCCGGCTCGT  
ATAATGTGTGGAATTGTGAGCGGATAACAATTTACACAGGAAACAGACCATGGAAATAAAAAC  
AGGTGCACGCATCCTCGCATTATCCGCATTAACGACGATGATGTTTTCCGCTCGGCTCTCGCC  
AAAATCGAAGAAGGTAACTGGTAATCTGGATTAACGGCGATAAAGGCTATAACGGTCTCGCTG  
AAGTCGGTAAGAAATTCGAGAAAGATACCGGAATTAAGTCAACGTTGAGCATCCGGATAAACT  
GGAAGAGAAATTCACACAGGTTGCGGCAACTGGCGATGGCCCTGACATTATCTTCTGGGCACAC  
GACCGCTTTGGTGGCTACGCTCAATCTGGCCTGTTGGCTGAAATCACCCCGGACAAAGCGTTCC  
AGGACAAGCTGTATCCGTTTACCTGGGATGCCGTACGTTACAACGGCAAGCTGATTGCTTACCC  
GATCGCTGTTGAAGCGTTATCGCTGATTTATAACAAAGATCTGCTGCCGAACCCGCCAAAACC  
TGGGAAGAGATCCCGGCGCTGGATAAAGAAGCTGAAAGCGAAAGGTAAGAGCGCGCTGATGTTCA  
ACCTGCAAGAACCGTACTTACCTGGCCGCTGATTGCTGCTGACGGGGGTTATGCGTTCAAGTA  
TGAAAACGGCAAGTACGACATTAAGACGTTGGGCGTGGATAACGCTGGCGCGAAAGCGGGTCTG  
ACCTTCTGGTTGACCTGATTAATAAACAACACATGAATGCAGACACCGATTACTCCATCGCAG  
AAGCTGCCTTTAATAAAGGCGAAACAGCGATGACCATCAACGGCCCGTGGGCATGGTCCAACAT  
CGACACCAGCAAAGTGAATTATGGTGTAAACGGTACTGCCGACCTTCAAGGGTCAACCATCCAAA  
CCGTTCTGGTGGCGTGTGAGCGCAGGTATTAACGCCCGCAGTCCGAACAAAGAGCTGGCAAAAG  
AGTTCCTCGAAAACCTATCTGCTGACTGATGAAGTCTGGAAGCGGTTAATAAAGACAAACCGCT

GGGTGCCGTAGCGCTGAAGTCTTACGAGGAAGAGTTGGCGAAAGATCCACGTATTGCCGCCACT  
ATGGAAAACGCCAGAAAGGTGAAATCATGCCGAACATCCCGCAGATGTCCGCTTTCTGGTATG  
CCGTGCGTACTGCGGTGATCAACGCCGCCAGCGGTGTCGACTGTGATGAAGCCCTGAAAGA  
CGCGCAGACTTATCCGTATGATGTGCCGATTATGCGGAGCTCACTAGTGGATCCGAATTCGGC  
TCCGTGACAAGTTTGC GGCCGCACTCGAGTCTAGAGGTACCATGAACGAGTCGCTCCATCCAC  
CGATGGATAATCGGGTACGCGAGGCTTGT CAGTACATCAGCGATCACCTGGCAGACAGCAATTT  
TGATATCGCCAGCGTCGCACAGCATGTTTGTCTTGTGCGCCGTGCGGTCTGT CACATCTTTTCCGC  
CAGCAGTTAGGGATTAGCGTCTTAAGCTGGCGCGAGGACCAACGCATTAGTCAGGCGAAGCTGC  
TTTTGAGCACTACCCGGATGCCTATCGCCACCGTGGTTCGCAATGTTGGTTTTGACGATCAACT  
CTATTTCTCGCGAGTATTTAAAAAATGCACCGGGGCCAGCCCAGCGAGTTTTCGTGGCGGTTGT  
GAAGAAAAAGTGAATGATGTAGCCGTCAAGTTGTCATAAAAGCTTGGCTGTTTTGGCGGATGAG  
AGAAGATTTTCAGCCTGATACAGATTAAATCAGAACGCAGAAGCGGTCTGATAAAACAGAATTT  
GCCTGGCGGCAGTAGCGCGGTGGTCCCACCTGACCCCATGCCGAACCTCAGAAGTAAAACGCCGT  
AGCGCCGATGGTAGTGTGGGGTCTCCCCATGCGAGAGTAGGGAACCTGCCAGGCATCAAATAAAA  
CGAAAGGCTCAGTCGAAAGACTGGGCCTTTTCGTTTTATCTGTTGTTTGTGCGGTGAACGCTCTCC  
TGAGTAGGACAAATCCGCCGGGAGCGGATTTGAACGTTGCGAAGCAACGGCCCGGAGGGTGGCG  
GGCAGGACGCCCGCCATAAACTGCCAGGCATCAAATTAAGCAGAAGGCCATCCTGACGGATGGC  
CTTTTTGCGTTTTCTACAAACTCTTTTTGTTTTATTTTTCTAAATACATTCAAATATGTATCCGCT  
CATGAGACAATAACCCTGATAAATGCTTCAATAATATTGAAAAAGACTAGTGGTCTTGAGGGGT  
TTTTTGCTGAAACCTCAGGCATTTGAGAAGCACACGGTCACACTGCTTCCGGTAGTCAATAAAC  
CGGTAAACCAGCAATAGACATAAGCGGCTATTTAACGACCCTGCCCTGAACCGACGACAAGCTG  
ACGACCGGGTCTCCGCAAGTGGCACTTTTTCGGGGAAATGTGCGCGGAACCCCTATTTGTTTTATT  
TTTCTAAATACATTCAAATATGTATCCGCTCATGAATTAATTCTTAGAAAACTCATCGAGCAT  
CAAATGAAACTGCAATTTATTCATATCAGGATTATCAATACCATATTTTTGAAAAAGCCGTTTC  
TGTAATGAAGGAGAAAACTCACCGAGGCAGTTCATAGGATGGCAAGATCCTGGTATCGGTCTG  
CGATTCCGACTCGTCCAACATCAATACAACCTATTAATTTCCCCTCGTCAAAAATAAGGTTATC  
AAGTGAGAAATCACCATGAGTGACGACTGAATCCGGTGAGAATGGCAAAAGTTTATGCATTTCT  
TTCCAGACTTGTTC AACAGGCCAGCCATTACGCTCGTCATCAAATCACTCGCATCAACCAAAC  
CGTTATTCATTCGTGATTGCGCCTGAGCGAGACGAAATACGCGGTGCTGTTAAAAGGACAATT  
ACAAACAGGAATCGAATGCAACCGGCGCAGGAACACTGCCAGCGCATCAACAATATTTTCACCT  
GAATCAGGATATTCTTCTAATACTGGAATGCTGTTTTCCCGGGGATCGCAGTGGTGAGTAACC  
ATGCATCATCAGGAGTACGGATAAAATGCTTGATGGTGGAAAGAGGCATAAAATCCGTCAGCCA  
GTTTAGTCTGACCATCTCATCTGTAACATCATTGGCAACGCTACCTTTGCCATGTTTCAGAAAC  
AACTCTGGCGCATCGGGCTTCCCATACAATCGATAGATTGTGCGACCTGATTGCCCCGACATTAT  
CGCGAGCCCATTTATACCCATATAAATCAGCATCCATGTTGGAATTTAATCGCGGCCTAGAGCA  
AGACGTTTCCCGTTGAATATGGCTCATACTCTTCTTTTTCAATATTATTGAAGCATTTATCAG  
GGTTATTGTCTCATGAGCGGATACATATTTGAATGTATTTAGAAAAATAAACAAATAGGCATGC  
AGCGCTCTTCCGCTTCCCTCGCTCACTGACTCGCTACGCTCGGTGCTTCGACTGCGGCGAGCGGT  
GTCAGCTCACTCAAAGCGGTAATACGGTTATCCACAGAATCAGGGGATAAAGCCGGAAAGAAC  
ATGTGAGCAAAAAGCAAAGCACCGGAAGAAGCCAACGCCGAGGCGTTTTTCCATAGGCTCCGC  
CCCCCTGACGAGCATCACAAAATCGACGCTCAAGCCAGAGGTGGCGAAACCCGACAGGACTAT  
AAAGATAACCAGGCGTTTTCCCCCTGGAAGCTCCCTCGTGCGCTCTCCTGTTCCGACCCTGCCGCT  
TACCGGATACCTGTCCGCCTTTCTCCCTTCGGGAAGCGTGGCGCTTTCTCATAGCTCACGCTGT  
TGGTATCTCAGTTCGGTGTAGGTCGTTGCTCCAAGCTGGGCTGTGTGCACGAACCCCCCGTTC  
AGCCCAGCCGCTGCGCCTTATCCGGTAACTATCGTCTTGAGTCCAACCCGGTAAGACACGACTT  
ATCGCCACTGGCAGCAGCCATTGGTAACTGATTTAGAGGACTTTGTCTTGAAGTTATGCACCTG  
TTAAGGCTAAACTGAAAGAACAGATTTTGGTGAGTGGGTCTCCAACCCACTTACCTTGGTTC

AAAGAGTTGGTAGCTCAGCGAACCTTGAGAAAACCACCGTTGGTAGCGGTGGTTTTTCTTTATT  
TATGAGATGATGAATCAATCGGTCTATCAAGTCAACGAACAGCTATTCCGTTACTCTAGATTC  
AGTCAATTTATCTCTTCAAATGTAGCACCTGAAGTCACTA

**Sequence S3: pAraGFP Nucleic Acid Sequence (3992bp)**

AGATCTATCGGCGTTAAACCCGCCACCAGATGGGCATTAACGAGTATCCCGGCAGCAGGGGATCATTTT  
GCGCTTCAGCCATACTTTTTCATACTCCCGCCATTTCAGAGAAGAAACCAATTGTCCATATTGCATCAGACA  
TTGCCGTCACTGCGTCTTTTACTGGCTCTTCTCGCTAACCAAACCGGTAACCCCGCTTATTTAAAAGCATT  
CTGTAACAAAGCGGGACCAAAGCCATGACAAAAACGCGTAACAAAAGTGTCTATAATCACGGCAGAAAAG  
TCCACATTGATTATTTGCACGGCGTCACACTTTGCTATGCCATAGCATTTTTATCCATAAGATTAGCGGA  
TCCTACCTGACGCTTTTTATCGCAACTCTCTACTGTTTCTCCATACCCGTTTTTTTTGGGCTAGCGAATTC  
GAGCTCGGTACCCGGGGATCCTCTAGATTTAATGAAGGAGATATACATATGAGTAAAGGAGAAGAACTTT  
TCACTGGAGTGGTCCCAGTTCTTGTGTAATTAGATGGCGATGTTAATGGGCAAAAATTCTCTGTCAGTGG  
AGAGGGTGAAGGTGATGCAACATACGGAAAACCTTACCCTTAATTTTTATTTGCACTACTGGGAAGCTACCT  
GTTCCATGGCCAACACTTGTCACTACTTTCTCTTATGGTGTTC AATGCTTCTCAAGATAACCCAGATCATA  
TGAAACAGCATGACTTTTTCAAGAGTGCCATGCCCGAAGGTTATGTACAGGAAAGAACTATATTTTACAA  
AGATGACGGGAAC TACAAGACACGTGCTGAAGTCAAGTTTGAAGGTGATACCCTTGTTAATAGAATCGAG  
TTAAAAGGTATTGATTTTAAAGAAGATGGAACATTCCTGGACACAAAATGGAATACAAC TATAACTCAC  
ATAATGTATACATCATGGGAGACAAACCAAAGAATGGCATCAAAGTTAACCTTCAAAATTAGACACAACAT  
TAAAGATGGAAGCGTTC AATTAGCAGACCATTATCAACAAAATACTCCAATTGGCGATGGCCCTGTCCTT  
TTACCAGACAACCATTACCTGTCCACACAATCTGCCCTTTCCAAAAGATCCCAACGAAAAGAGAGATCACA  
TGATCCTTCTTGAGTTTGTAAACAGCTGCTAGGATTACACATGGCATGGATGAACTATACAAAAAGCTTGG  
CTGTTTTGGCGGATGAGAGAAGATTTTCAGCCTGATACAGATTAATCAGAACGCAGAAGCGGTCTGATA  
AAACAGAATTTGCCTGGCGGCAGTAGCGCGGTGGTCCCACCTGACCCCATGCCGAAC T CAGAAGTGAAAC  
GCCGTAGCGCCGATGGTAGTGTGGGGTCTCCCCATGCGAGAGTAGGGAAC T GCCAGGCATCAAATAAAAC  
GAAAGGCTCAGTCGAAAGACTGGGCCTTTTCGTTTTATCTGTTGTTTGTTCGGTGAACGCTCTCCTGAGTAG  
GACAAATCCGCCGGGAGCGGATTTGAACGTTGCGAAGCAACGGCCCCGGAGGGTGGCGGGCAGGACGCCCG  
CCATAAACTGCCAGGCATCAAATTAAGCAGAAGGCCATCCTGACGGATGGCCTTTTTTGCCTTTCTACAAA  
CTCTTTTGTTTATTTTTCTAAATACATTCAAATATGTATCCGCTCATGAGACAATAACCCTGATAAATGC  
TTCAATAATATTGAAAAAGGAAGAGTATGAGTATTCAACATTTCCGTGTCGCCCTTATTCCCTTTTTTGC  
GGCATTTTGCCTTCTGTTTTTGTCTACCCAGAAACGCTGGTGAAGTAAAAGATGCTGAAGATCAGTTG  
GGTGCACGAGTGGGTACATCGAACTGGATCTCAACAGCGGTAAGATCCTTGAGAGTTTTTCGCCCGAAG  
AACGTTTTCCAATGATGAGCACTTTTAAAGTTCTGCTATGTGGCGCGGTATTATCCCGTGTGACGCCGG  
GCAAGAGCAACTCGGTGCGCCGCATACACTATTCTCAGAATGACTTGGTTGAGTACTCACCAGTCACAGAA  
AAGCATCTTACGGATGGCATGACAGTAAGAGAATTATGCAGTGTGCCATAACCATGAGTGATAACACTG  
CGGCCAACTTACTTCTGACAACGATCGGAGGACCGAAGGAGCTAACCCTTTTTTGCACAACATGGGGGA  
TCATGTAAC TCGCCTTGATCGTTGGGAACCGGAGCTGAATGAAGCCATACCAAACGACGAGCGTGACACC  
ACGATGCCTGCAGCAATGGCAACAACGTTGCGCAAAC TATTAAC TGGCGAACTACTTACTCTAGCTTCCC  
GGCAACAATTAATAGACTGGATGGAGGCGGATAAAGTTGCAGGACC ACTTCTGCGCTCGGCCCTTCCGGC  
TGGCTGGTTTTATTGCTGATAAATCTGGAGCCGGT GAGCGTGGGTCTCGCGGTATCATTGCAGCACTGGGG  
CCAGATGGTAAGCCCTCCCCTATCGTAGTTATCTACACGACGGGGAGTCAGGCAACTATGGATGAACGAA  
ATAGACAGATCGCTGAGATAGGTGCC TCACTGATTAAGCATTGGTAACTGT CAGACCAAGTTTACTCATA  
TATACTTTAGATTGATTTACGCGCCCTGTAGCGGCGCATTAAAGCGCGGGGTGTGGTGGTTACGCGCAG  
CGTGACCGCTACACTTGCCAGCGCCCTAGCGCCCGCTCCTTTTCGCTTTCTTCCCTTCTTTCTCGCCACG  
TTCGCCGGCTTTCCCCGTCAAGCTCTAAATCGGGGGCTCCCTTTAGGGTTCCGATTTAGTGCTTTACGGC  
ACCTCGACCCCAAAAAACTTGATTTGGGTGATGGTTCACGTAGTGGGCCATCGCCCTGATAGACGGTTTTT  
TCGCCCTTTGACGTTGGAGTCCACGTTCTTTAATAGTGGACTCTTGTTCCAAACTTGAACAACACTCAAC  
CCTATCTCGGGCTATTCTTTT GATTTATAAGGGATTTTGCCGATTTTCGGCCTATTGGTTAAAAAATGAGC  
TGATTTAACAAAAATTTAACGCGAATTTTAAACAAAATATTAACGTTTACAATTTAAAAGGATCTAGGTGA  
AGATCCTTTTTTGATAATCTCATGACCAAATCCCTTAACGTGAGTTTTCGTTCCACTGAGCGTCAGACCC  
CGTAGAAAAGATCAAAGGATCTTCTTGAGATCCTTTTTTTCTGCGCGTAATCTGCTGCTTGCAAACAAAA  
AAACCACCGCTACCAGCGGTGGTTTTGTTTTGCCGGATCAAGAGCTACCAACTCTTTTTCCGAAGGTAAC T G  
GCTTCAGCAGAGCGCAGATACCAAATACTGTCTTCTAGTGTAGCCGTAGTTAGGCCACCACTTCAAGAA  
CTCTGTAGCACCGCTACATACCTCGCTCTGCTAATCCTGTTACCAGTGGCTGCTGCCAGTGGCGATAAG

TCGTGTCTTACCGGGTTGGACTCAAGACGATAGTTACCGGATAAGGCGCAGCGGTTCGGGCTGAACGGGGG  
GTTTCGTGCACACAGCCCAGCTTGGAGCGAACGACCTACACCGAACTGAGATACCTACAGCGTGAGCTATG  
AGAAAGCGCCACGCTTCCCGAAGGGAGAAAGGCGGACAGGTATCCGGTAAGCGGCAGGGTTCGGAACAGGA  
GAGCGCACGAGGGAGCTTCCAGGGGGAAACGCCTGGTATCTTTATAGTCCTGTTCGGGTTTCGCCACCTCT  
GACTTGAGCGTCGATTTTTGTGATGCTCGTCAGGGGGCGGAGCCTATGGAAAAACGCCAGCAACGCGGC  
CTTTTTACGGTTCCTGGCCTTTTGGCTGGCCTTTTGGCTCACATGTTCTTTCCTGCGTTATCCCCTGATTCT  
GTGGATAACCGTATTACCGCCTTTGAGTGAGCTGATACCGCTCGCCGCAGCCGAACGACCGAGCGCAGCG  
AGTCAGTGAGCGAGGAAGCGGAAGAGCGCCTGATGCGGTATTTTCTCCTTACGCATCTGTGCGGTAGGTA  
CC
